# Supplementary material
Source: publisher figshare collection journal article supplement (https://tandf.figshare.com/ndownloader/files/9129997)
Supplement: Supplementary file 1 [file 9129997]

**Experimental and thermomechanical analysis of friction stir welding of poly(methyl methacrylate) sheets**

Hamed Aghajani Derazkolaa* and Abdolreza Simchib,c*

aYoung Researchers and Elites Club, Science and Research Branch, Islamic Azad University, Tehran, Iran.

bDepartment of Materials Science and Engineering, Sharif University of Technology, P.O. Box 11365-9466, Azadi Avenue, 14588 Tehran, Iran

cInstitute for Nanoscience and Nanotechnology, Sharif University of Technology, P.O. Box 11365-9466, Azadi Avenue, 14588 Tehran, Iran

*Corresponding authors: hamed.aghajani@srbiau.ac.ir; [simchi@sharif.edu](mailto:simchi@sharif.edu)

Tel: +98 (21) 6616 5226; Fax: +98 (21) 6600 5717


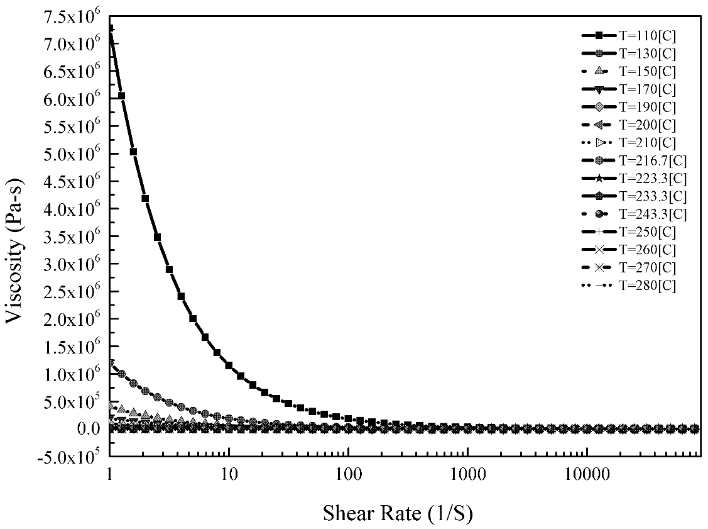

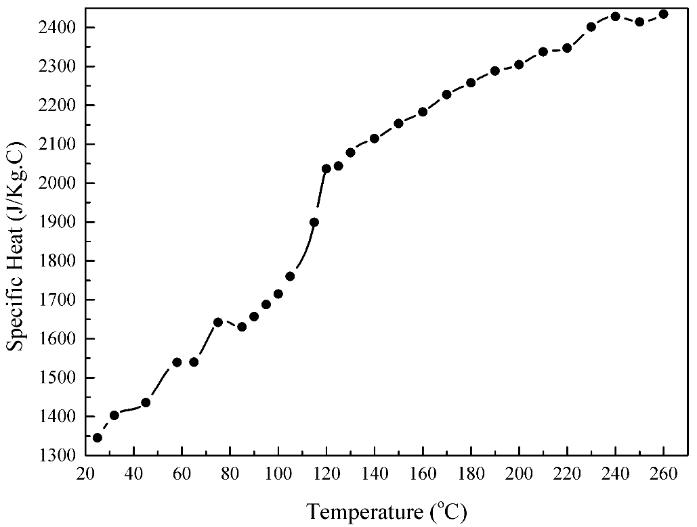


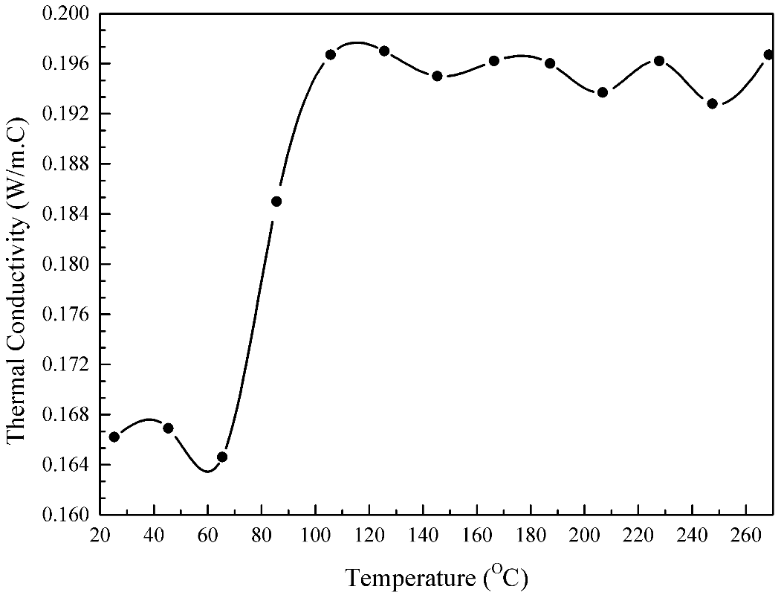


**S1.** Properties of PMMA. (a) Viscosity as a function of shear rate. (b) Heat capacity. (c) Thermal conductivity [1-5]. The emissivity coefficient of the PMMA was selected 0.97 from literature [6].

**S2.** Thermal properties of the steel tool are deduced from Ref. [7] and used:

(1)

(2)

**S3.** Properties of the commercial PMMA sheet used in this study. For comparison, the reported values in literatures [1-5] are shown.

| Property | Measured values | Reported values |
| --- | --- | --- |
| Density (g/cm3) | 2.57 | 2.58 |
| Tensile Strength (MPa) | 69.8 | 70 |
| Young Modulus (GPa) | 72 | 72.3 |
| Elongation (%) | 4.73 | 4.8 |
| Poison’s Ratio | 0.2 | 0.2 |


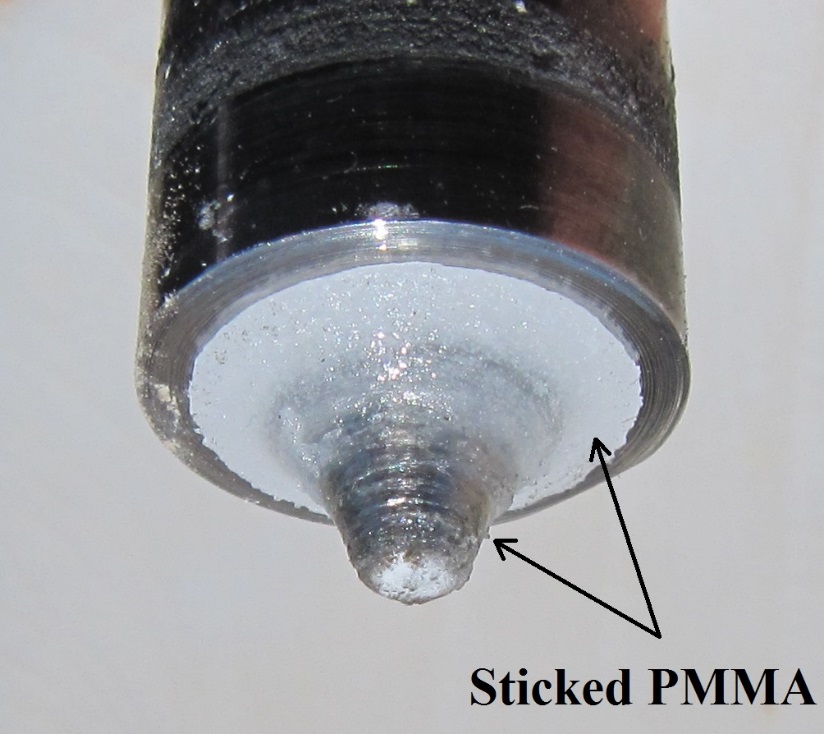


**Fig. S2.** Electronic image showing sticking of PMMA to the tool.

**References**

[1] Plastics Processing Data Handbook, 2nd ed. Rosato V D, NewYork: Springer-Verlag.; 1997.

[2] The Physics of Polymers: Concepts for Understanding Their Structures and Behavior, Gert Strobl G, editor. Berlin: Springer-Verlag.; 2007.

[3] Polymer Blends Handbook, Vol. 1, Utracki L A. NewYork: Kluwer Academic Publishers.; 2002.

[4] Polymer Data handbook, Mark J E. London: Oxford University Press.; 1999.

[5] Handbook of Polymers, Wypych G. Ontario: ChemTec Publishing.; 2012.

[6] Urbas J, Parker WJ, Gerald E. Luebbers GE. Surface temperature measurements on burning materials using an infrared pyrometer: accounting for emissivity and reflection of external radiation. Fire Mater. 2004; 28:33–53.

[7] Nandan R, Roy GG, Lienert TJ, et al. Three-dimensional heat and material flow during friction stir welding of mild steel. Acta Mater. 2007;55:883–895.
